# Supplementary material for: Time‐series transcriptomics and proteomics reveal alternative modes to decode p53 oscillations
Source: PubMed Central journal article supplement (PMC8919251; doi:10.15252/msb.202110588), 2022-03-14

## Appendix

### Time-series transcriptomics and proteomics reveal alternative modes to decode p53 oscillations

Alba Jimenez<sup>\*.1</sup>, Dan Lu<sup>\*.1</sup>, Marian Kalocsay<sup>1,2</sup>, Matthew J. Berberich<sup>2,3</sup>, Petra Balbi<sup>1</sup>, Ashwini Jambhekar<sup>\*\*1</sup>, Galit Lahav<sup>\*\*1</sup>

\*=authors with equal contributions

\*\*= co-corresponding authors

- 1 Department of Systems Biology, Blavatnik Institute at Harvard Medical School, Boston, MA 02115, USA
- 2 Laboratory of Systems Pharmacology, Blavatnik Institute at Harvard Medical School, Boston, MA 02115, USA
- 3 Center for Protein Degradation, Dana-Farber Cancer Institute, Boston, MA 02115

Correspondence: galit@hms.harvard.edu / ashwini\_jambhekar@hms.harvard.edu

## Table of content

**Appendix Figure S1.** Flowcharts detailing the different data sets and filters used in the study.

**Appendix Figure S2.** mRNA and protein profiles of house-keeping genes GAPDH and TUBB, and p53 targets E2F7 and XPC.

**Appendix Figure S3.** mRNA and protein profiles of all targets classified into the 11 categories of dynamical responses.

# Appendix Figure S1

**A**

## Data sets

RNASeq  
p53 pulsatile

RNASeq  
p53 rising

TMT Mass-Spec  
p53 pulsatile

TMT Mass-Spec  
p53 rising

Chip-seq p53  
bound targets

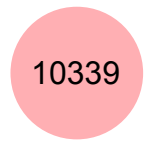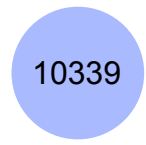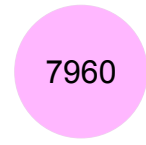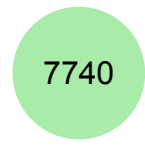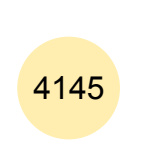

## Filters

Differential mRNA expression:  
Fold change > 1.5,  
FDR < 0.2 and  
Pearson corr. between replicates > 0.5

Differential Protein expression:  
Fold change > 1.15,  
FDR < 0.2 and  
Pearson corr. between replicates > 0.5

## Legend

- RNASeq pulsatile
- RNASeq rising
- Mass-Spec pulsatile
- Mass-Spec rising
- Chip-seq
- Diff. exp. mRNA
- Diff. exp. protein

## B Flowchart Figures 2-3

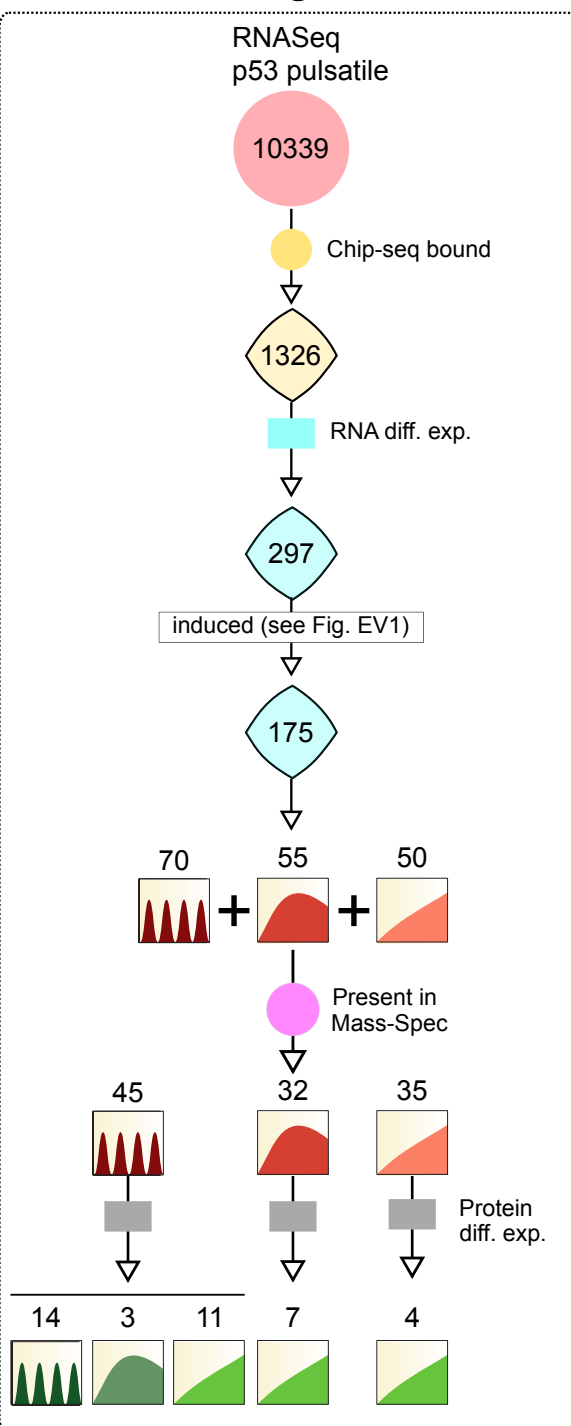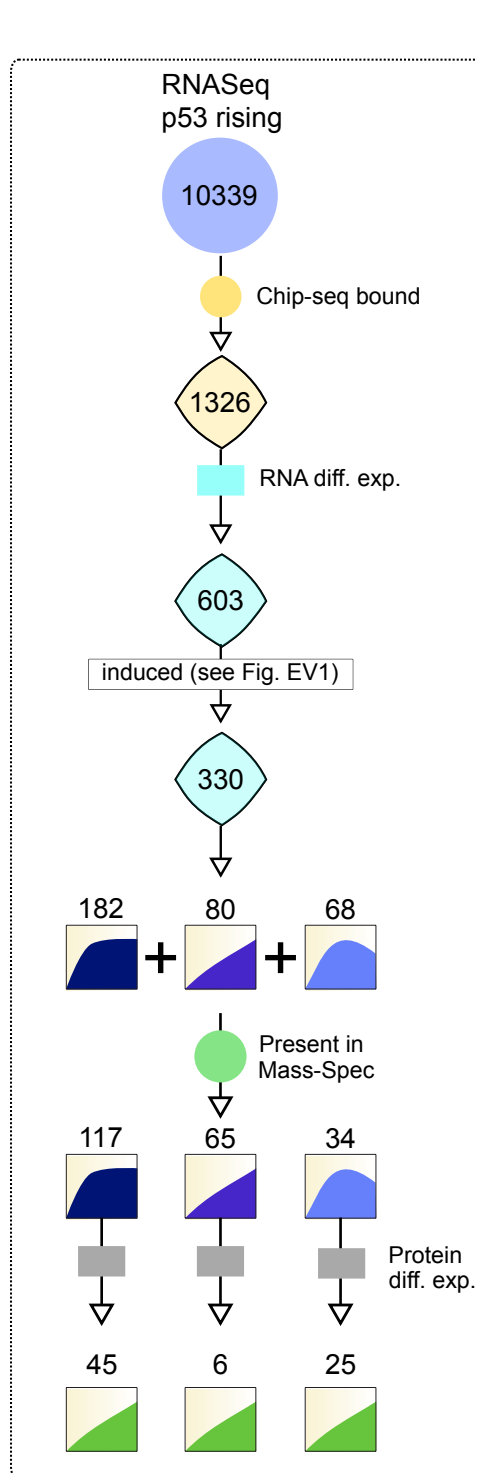

## C Flowchart Figure 4

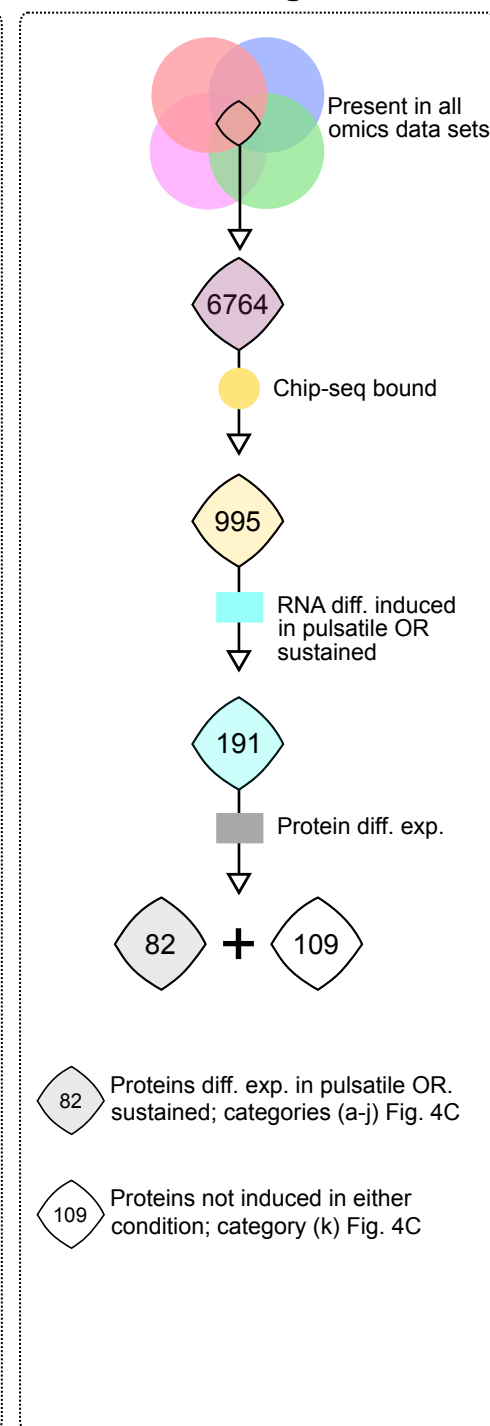

**Appendix Figure S1:** Flowcharts detailing (A) The different data sets and filters used in the study (B) Flowcharts for Figures 2 and 3 (C) Flowchart for Figure 4.

# Appendix Figure S2

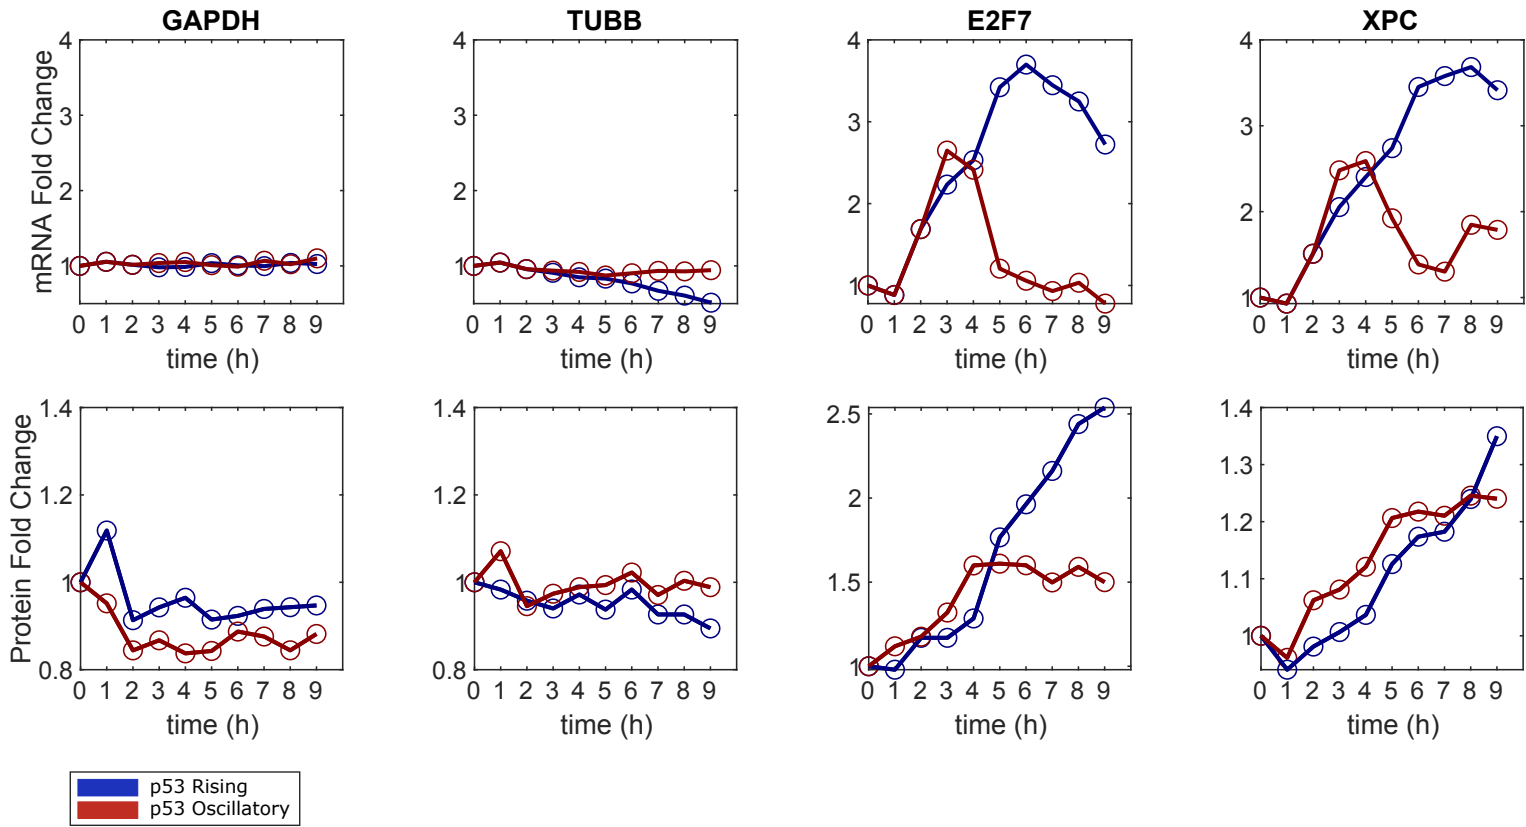

**Appendix Figure S2:** mRNA and protein profiles of house-keeping genes GAPDH and TUBB, as well as two p53 targets E2F7 and XPC.

# Appendix Figure S3

category (a)

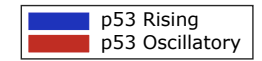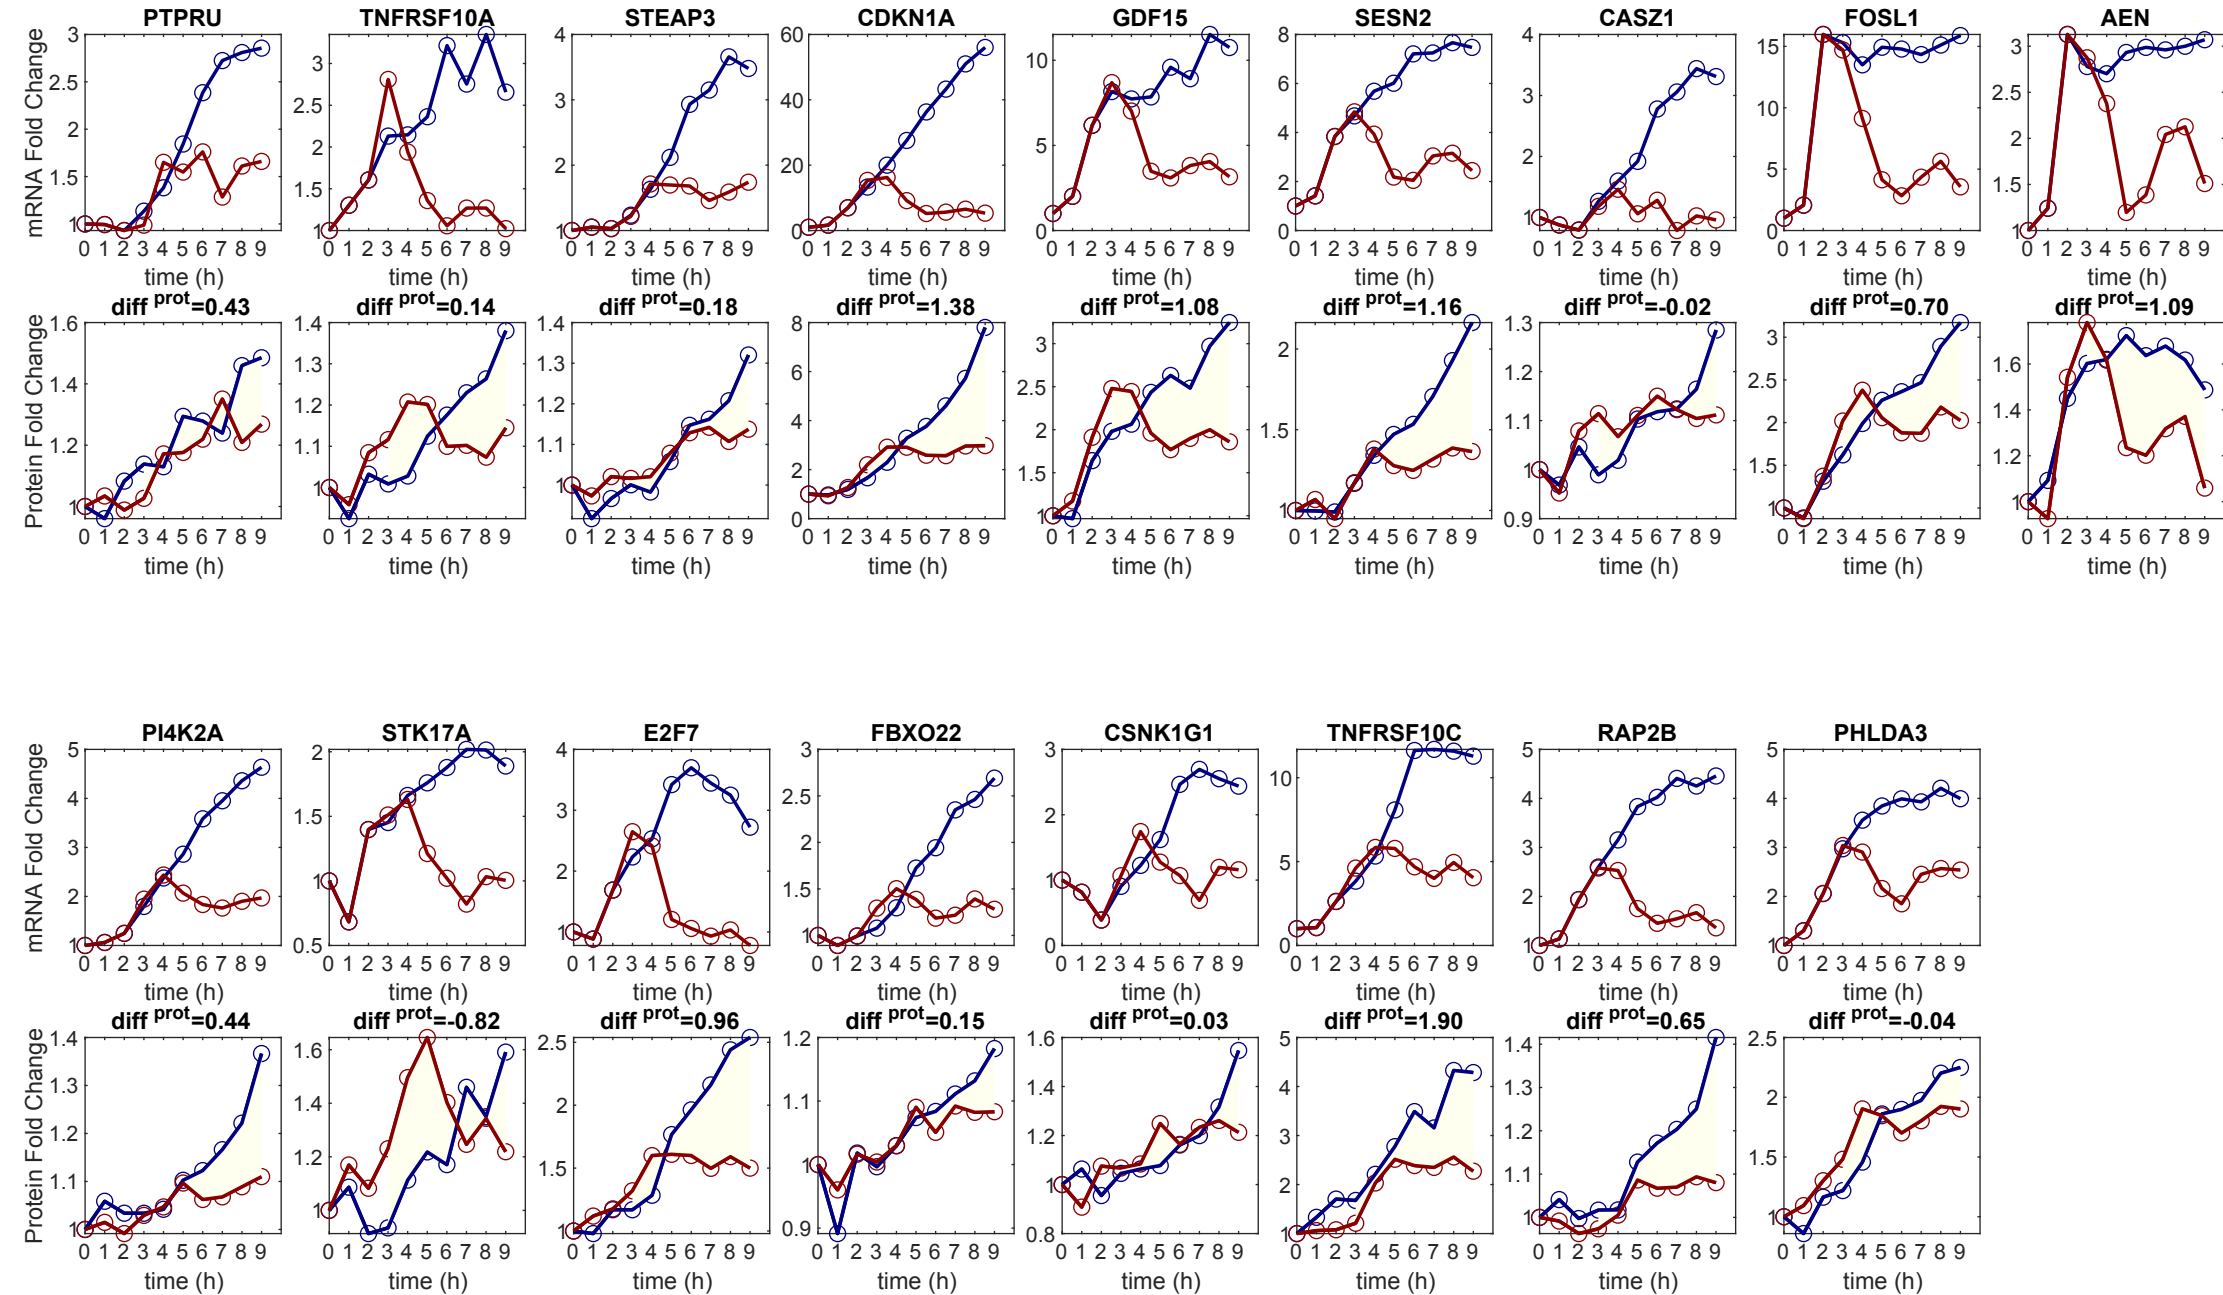

**Appendix Figure S3:** mRNA and protein profiles of all targets classified into 11 categories (a-k) of dynamical responses as defined in Figure 4.

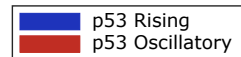

category (b)

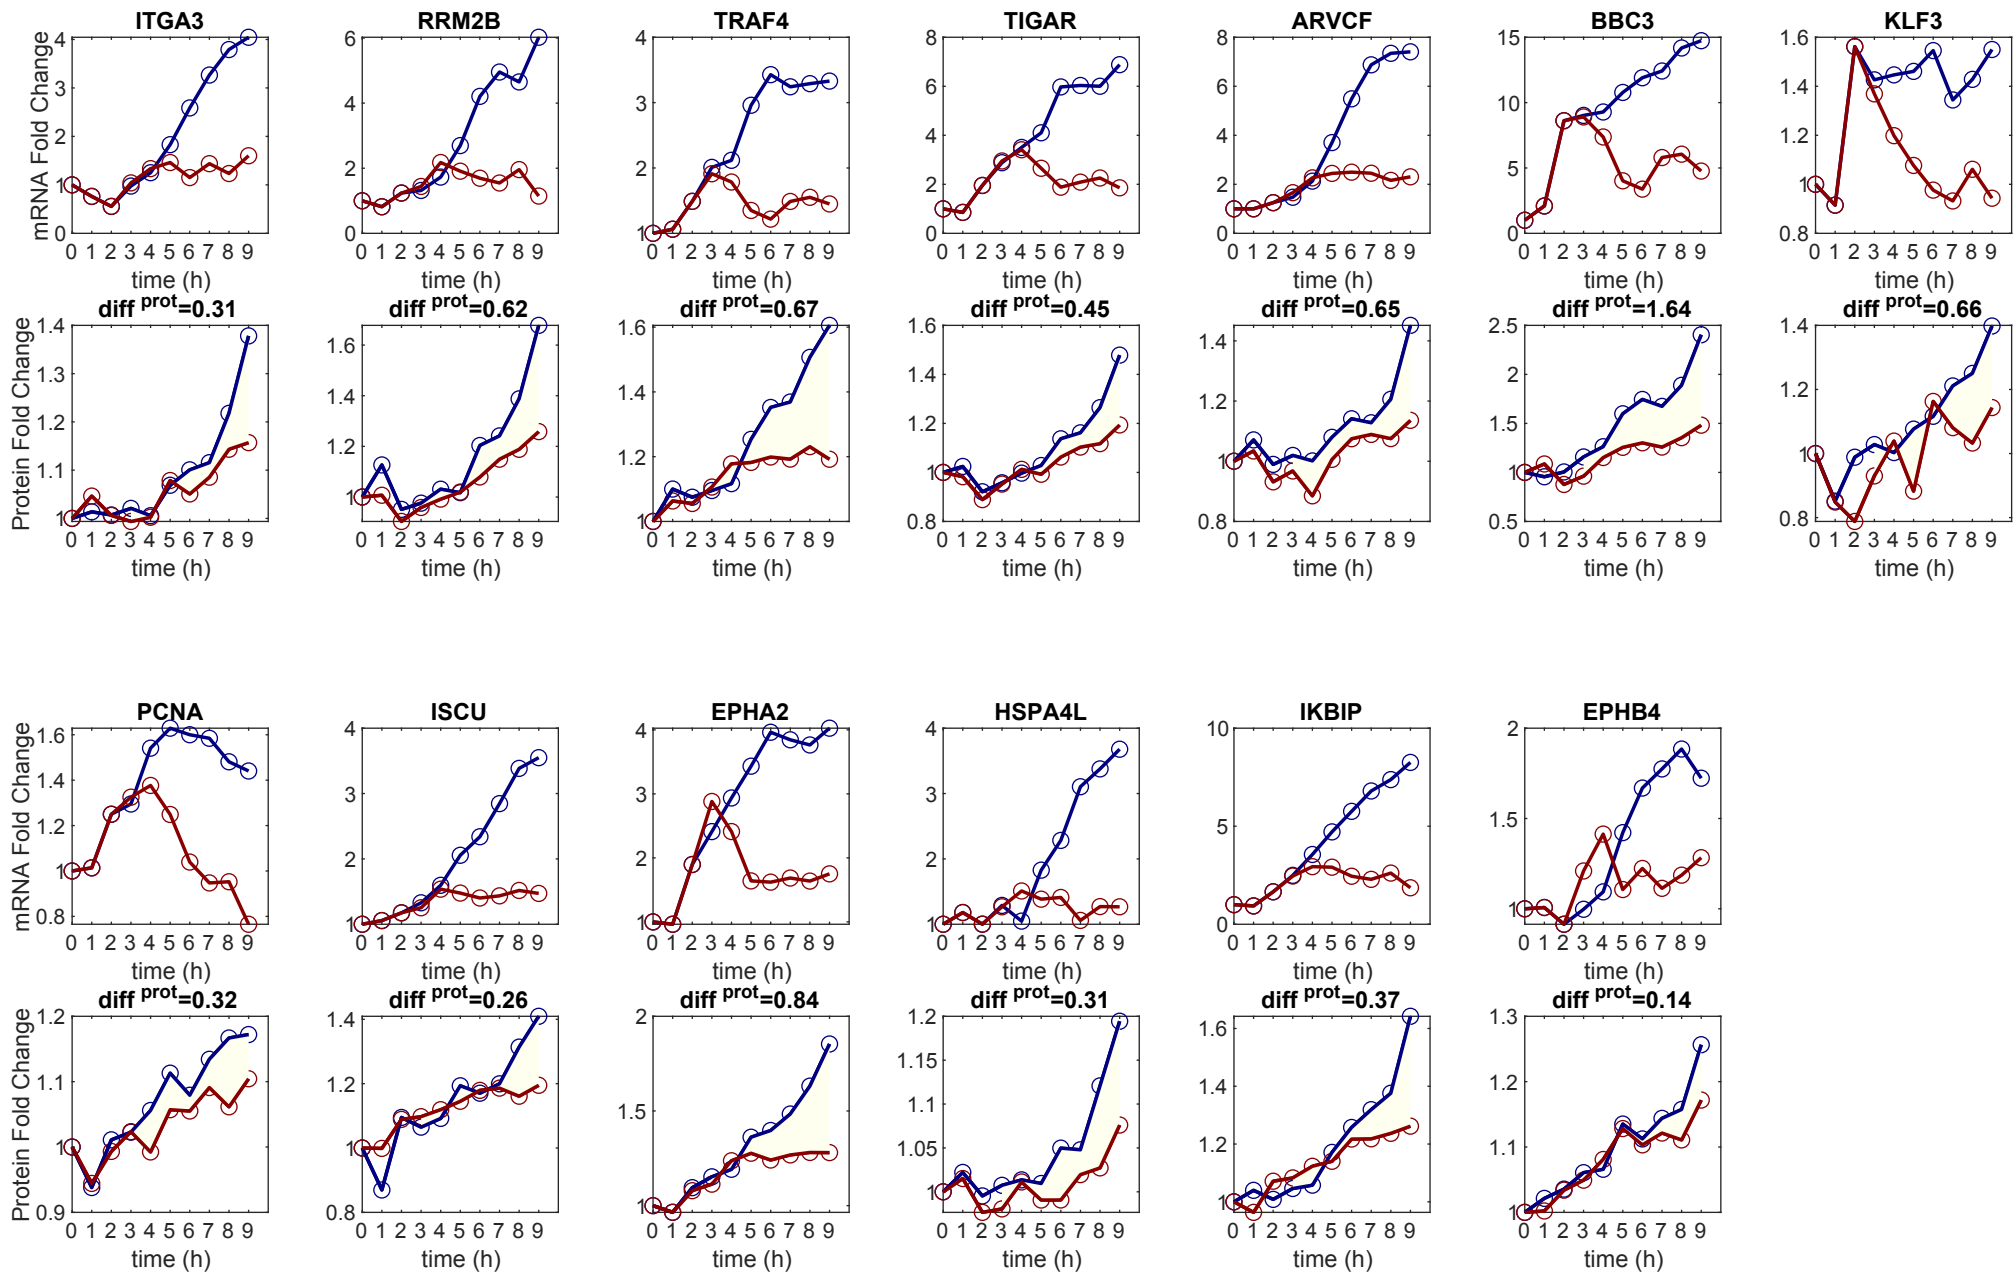

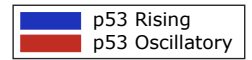

category (c)-page1

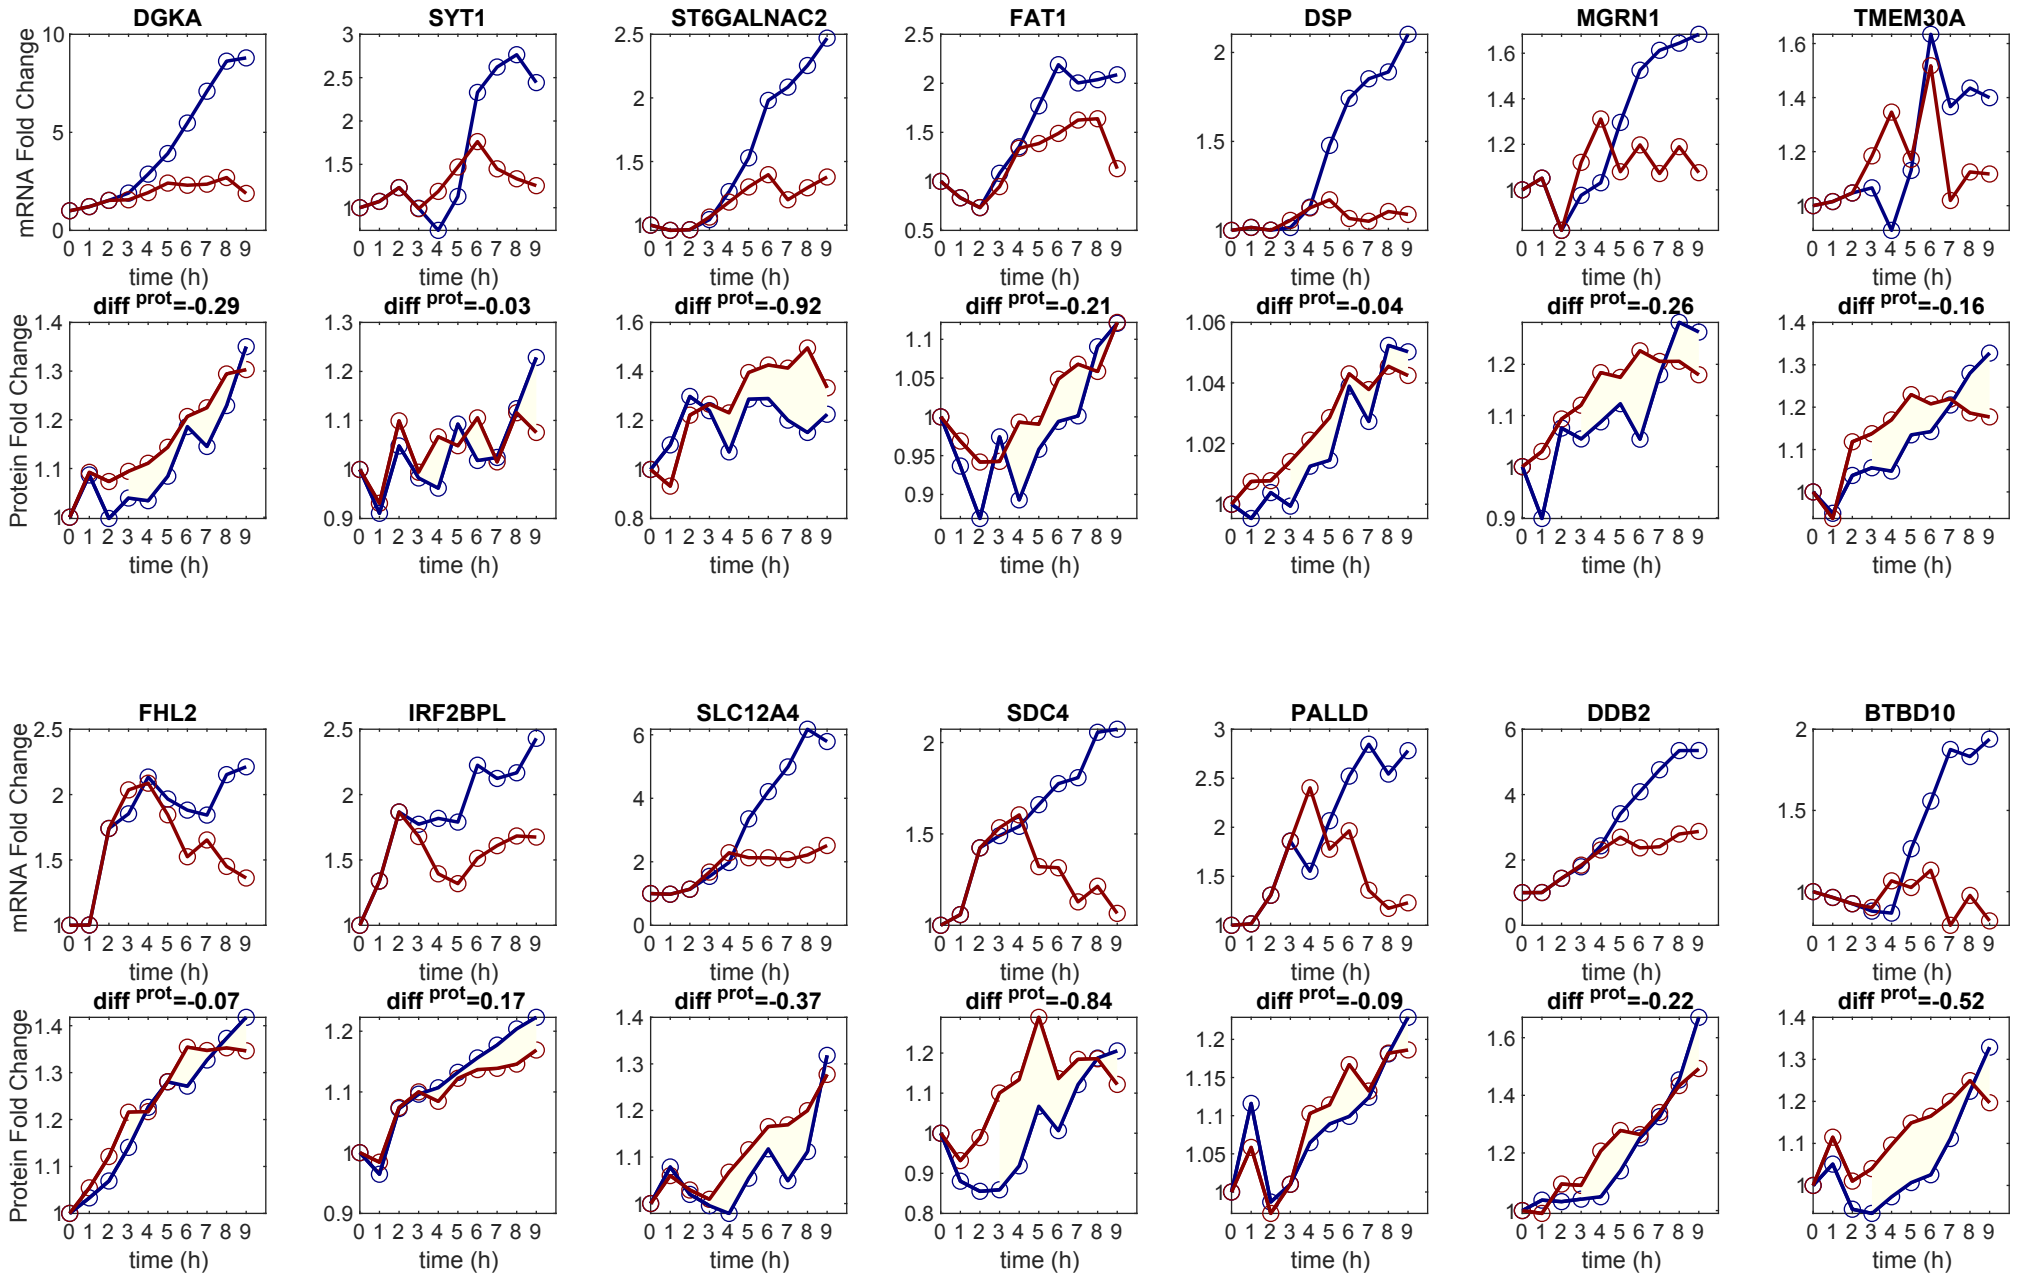

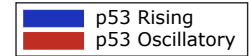

category (c)-page2

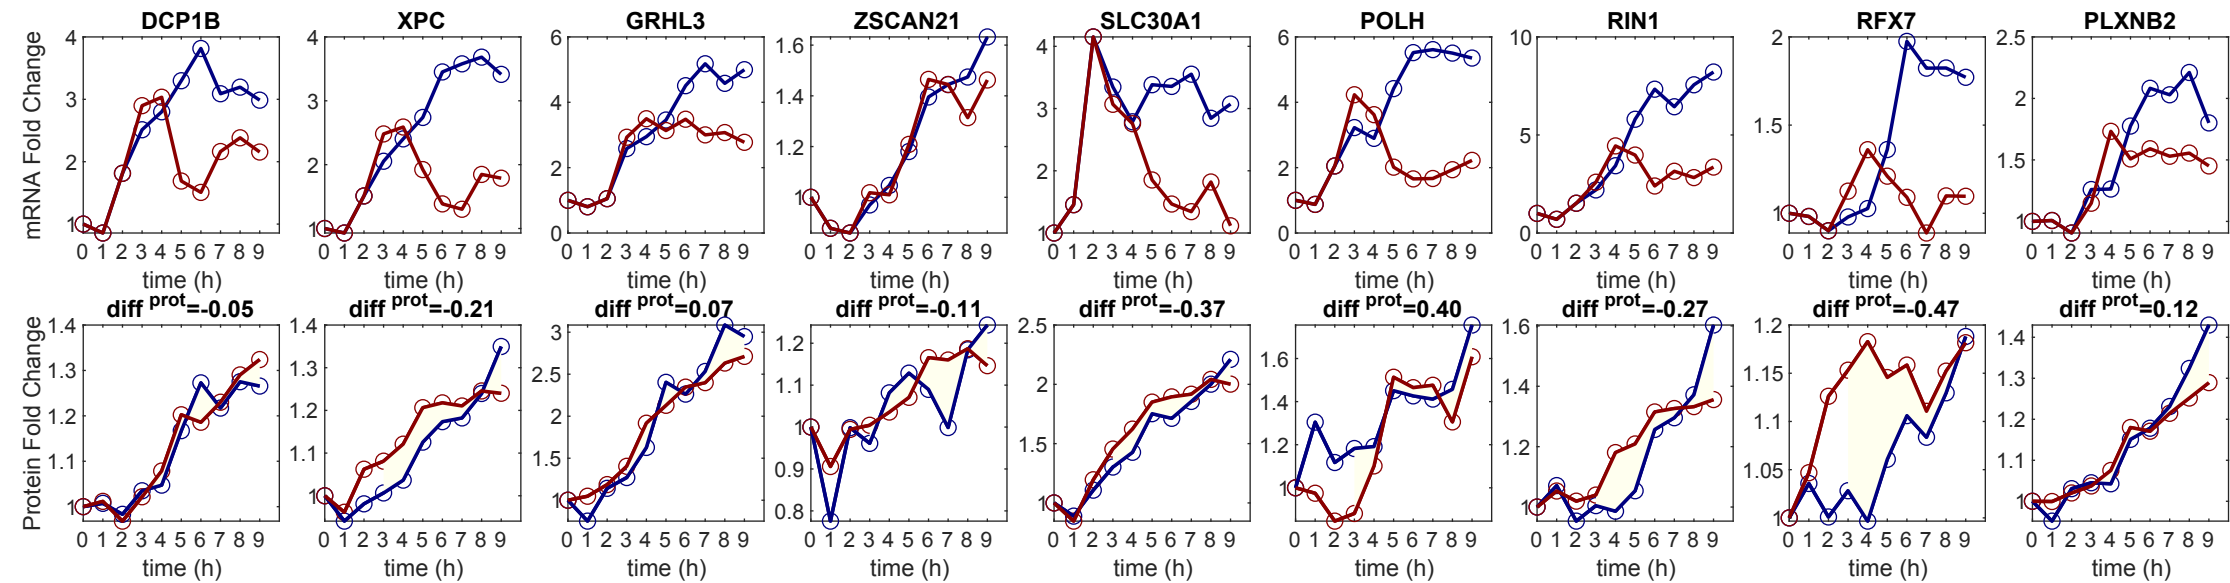

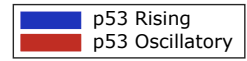

category (d)

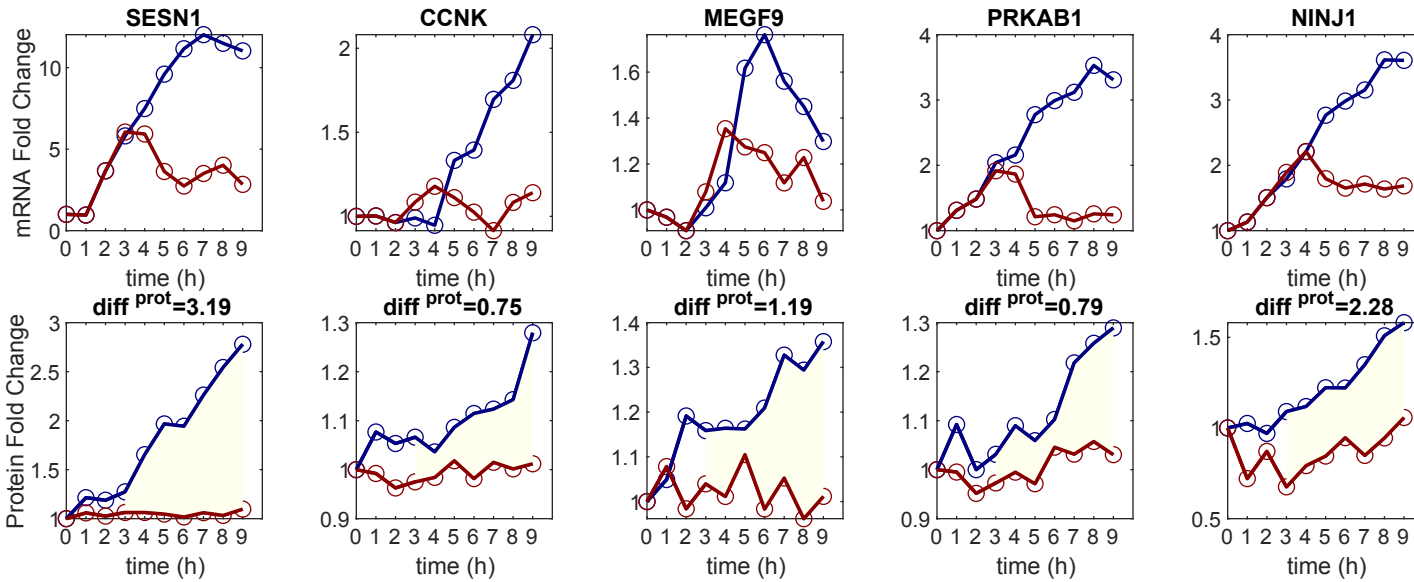



category (e)

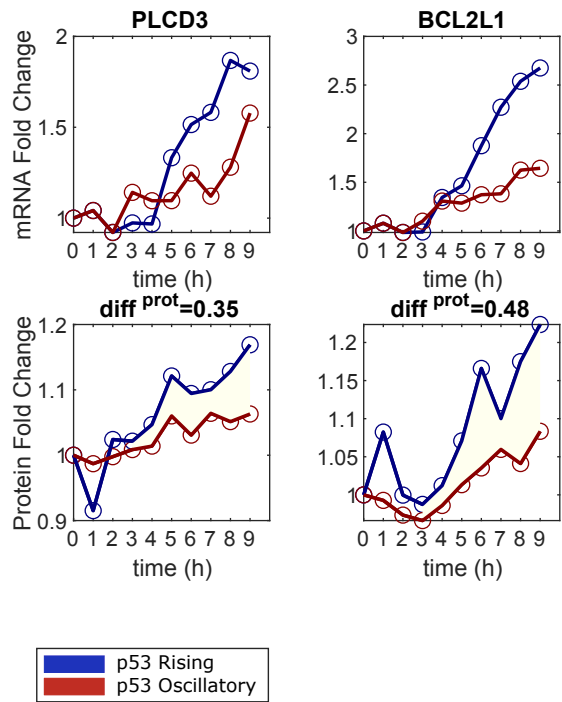

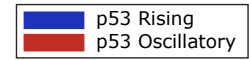

category (f)

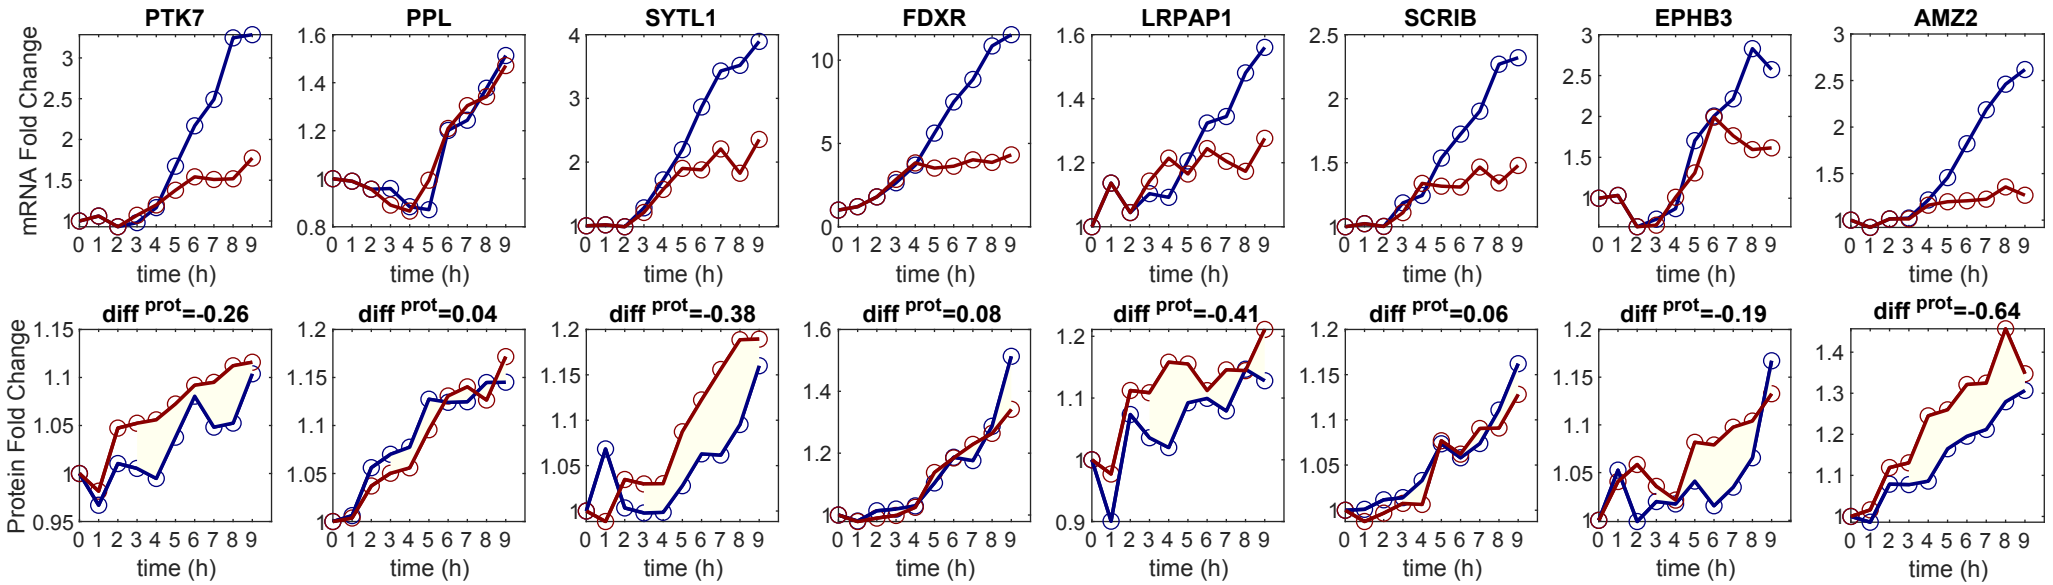

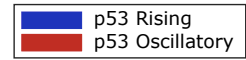

category (g)

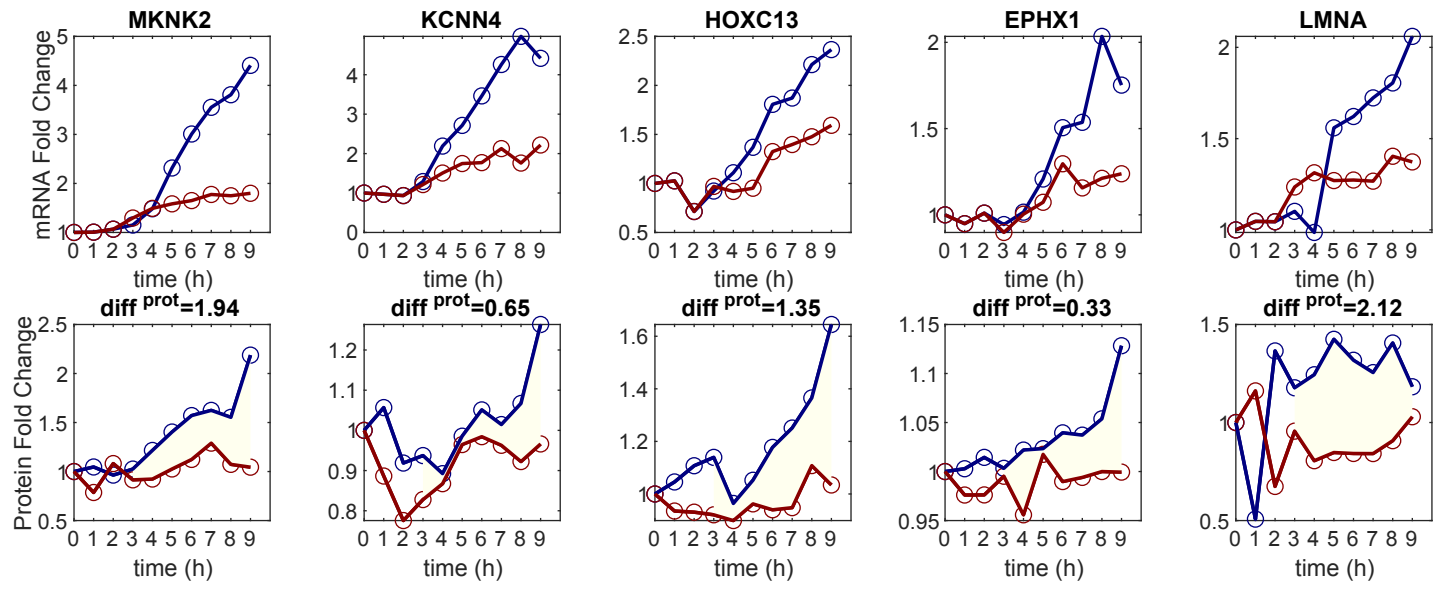

category (h)

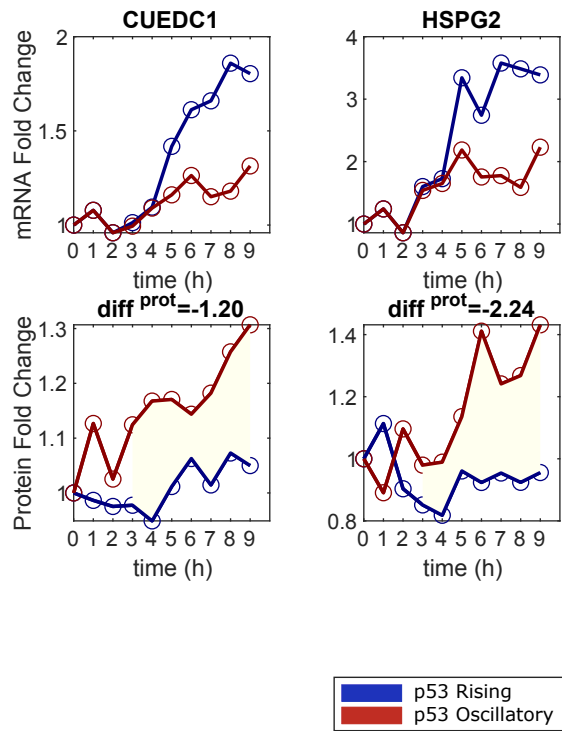

category (i)

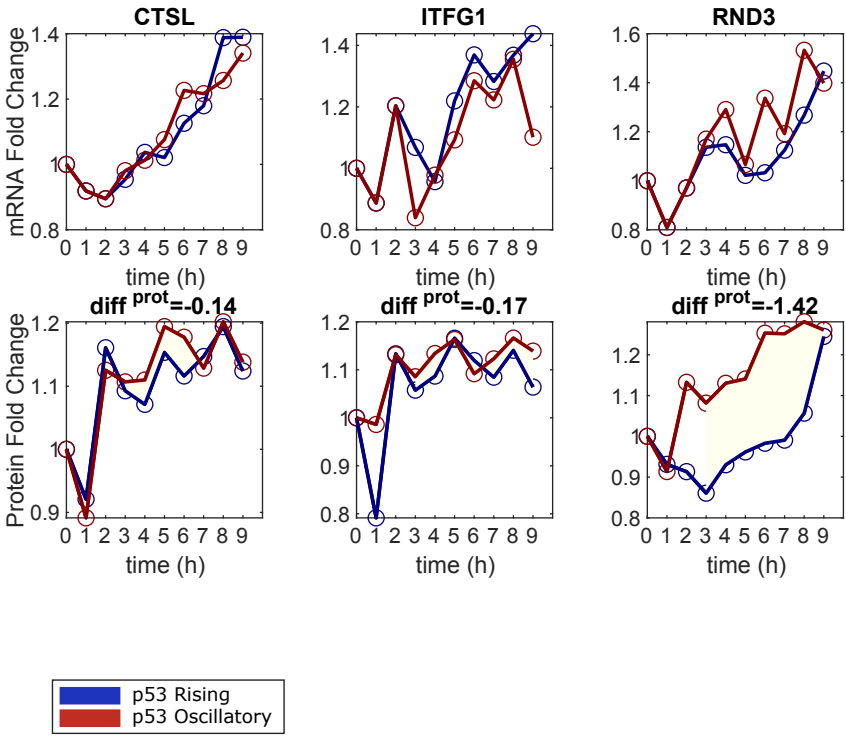

category (j)

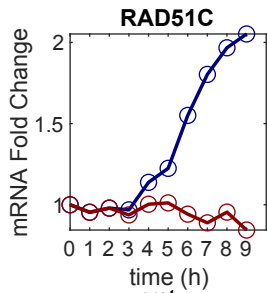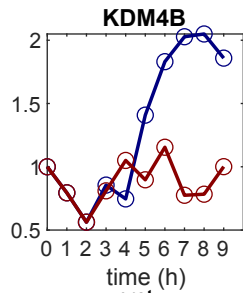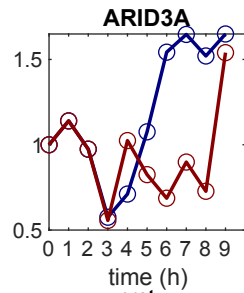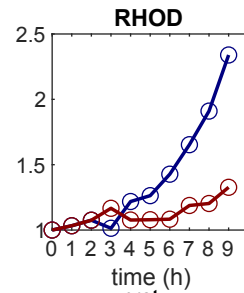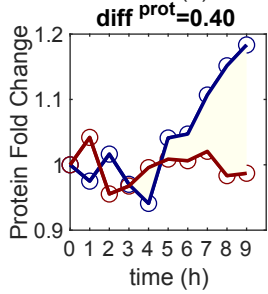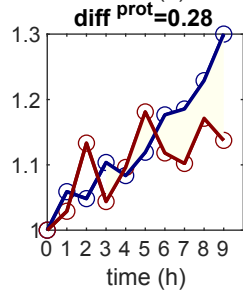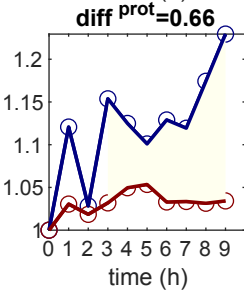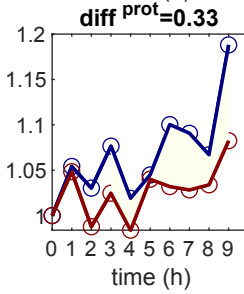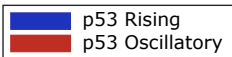

Supplement: MSB-18-e10588-s004.pdf [file MSB-18-e10588-s004.pdf]
