# Supplementary material for: Time‐series transcriptomics and proteomics reveal alternative modes to decode p53 oscillations
Source: PubMed Central journal article supplement (PMC8919251; doi:10.15252/msb.202110588), 2022-03-14
Supplement: MSB-18-e10588-s005.pdf [file MSB-18-e10588-s005.pdf]

## Expanded View Figures

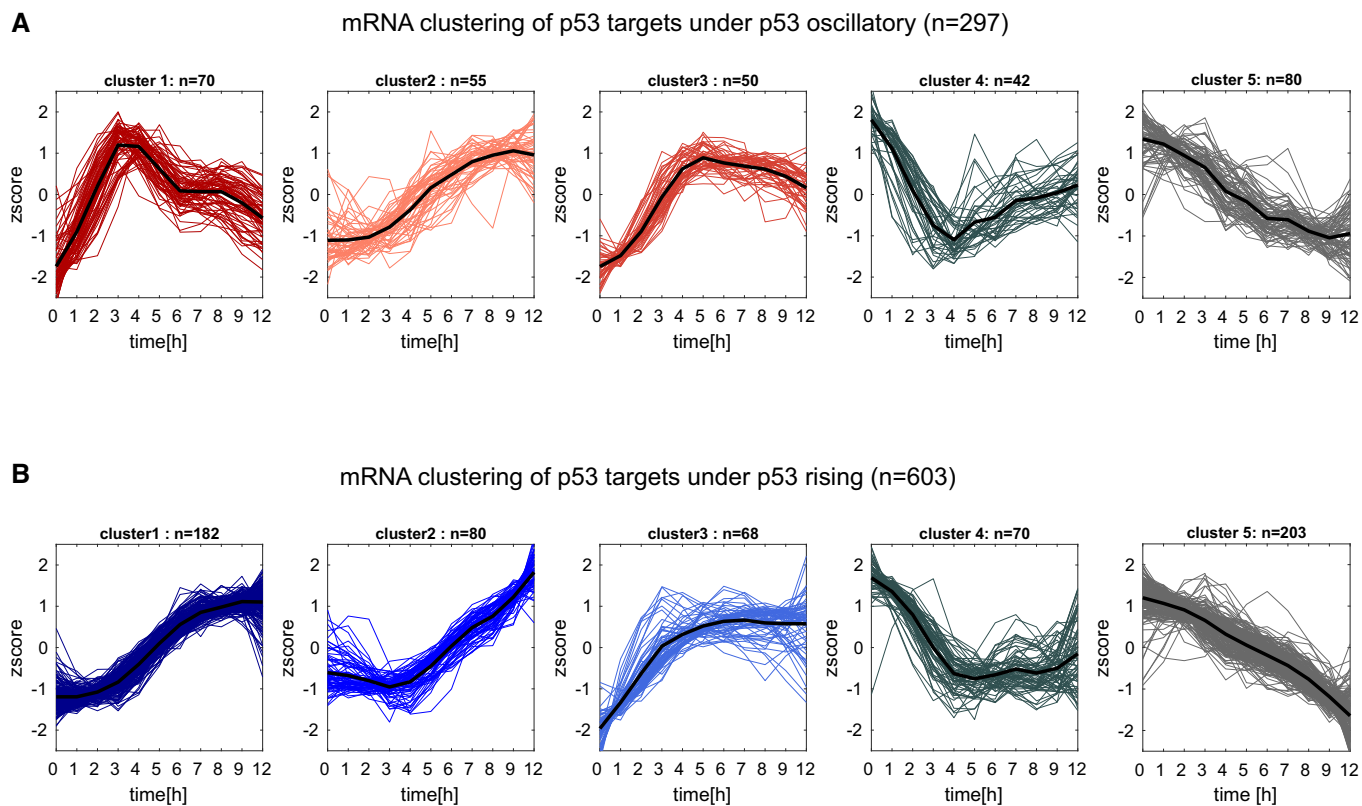

**Figure EV1. Clustering of p53 mRNA targets under oscillating and pulsatile p53 expression.**

A, B p53 target genes were clustered via fuzzy c-means clustering according to their mRNA expression profiles under (A) oscillatory or (B) rising p53 expression. Differential mRNA expression was defined as fold change  $> 1.5$  and FDR  $< 0.2$  (t-test, Benjamini–Hochberg corrected) based on two independent experiments. mRNAs were clustered based on their normalized time traces (z score) into five expression clusters under oscillatory and rising p53.

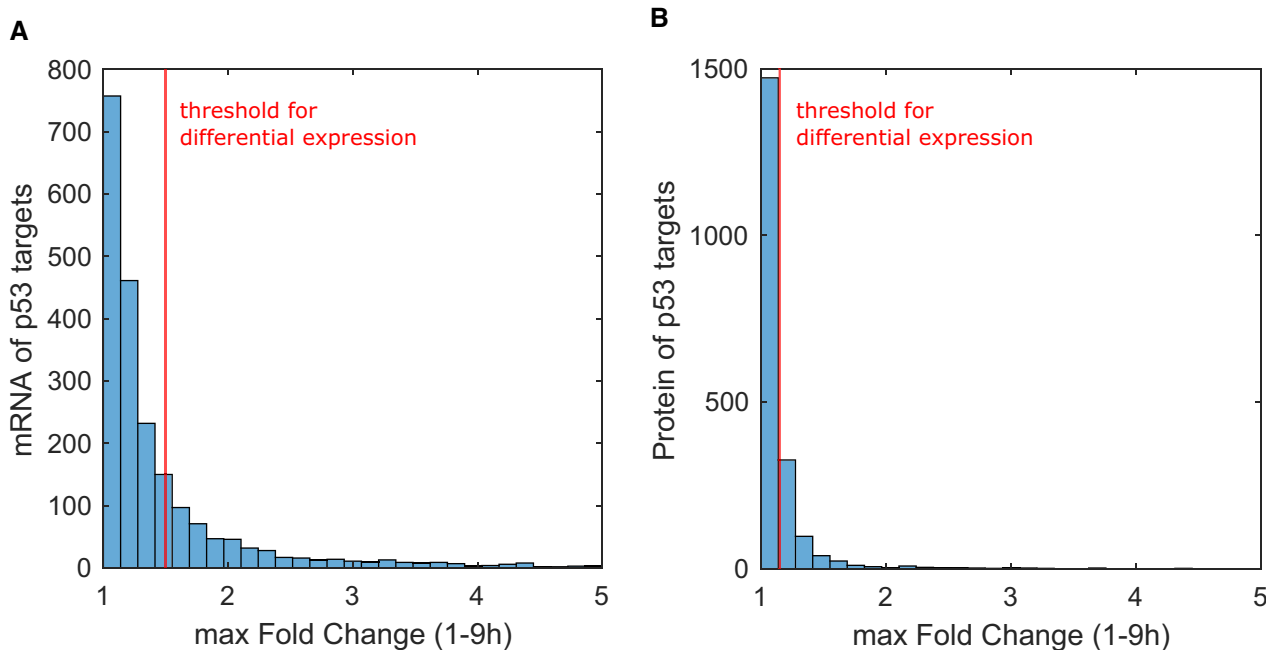

**Figure EV2. Fold change in expression of mRNA and protein levels of p53 targets.**

A, B Maximum fold-change (FC) distribution of mRNA and protein levels of p53 targets under both oscillatory and rising p53. Maximum fold change is calculated as the largest FC value from 1 to 9 h. Red vertical lines indicate fold-change threshold to consider an mRNA ( $FC > 1.5$ ) or protein ( $FC > 1.15$ ) differentially expressed.

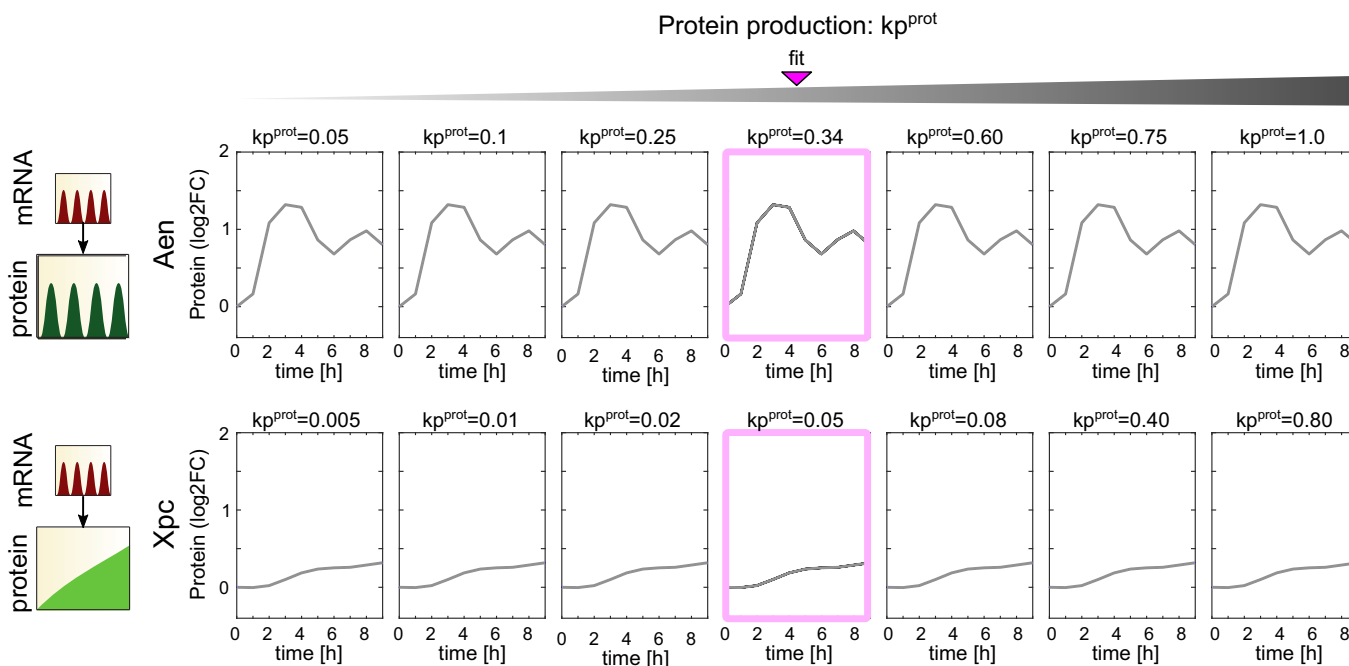

**Figure EV3. Predicted protein expression trajectories of two representative p53 target genes for different values of  $k_p^{prot}$ .**

Protein expression trajectories for targets showing the mRNA and protein dynamics indicated at the left were modeled for the indicated values of  $k_p^{prot}$  (with  $k_d^{prot}$  fixed at the value determined in Fig 3C). Pink box shows the value of  $k_p^{prot}$  that best fits the experimentally measured protein levels.

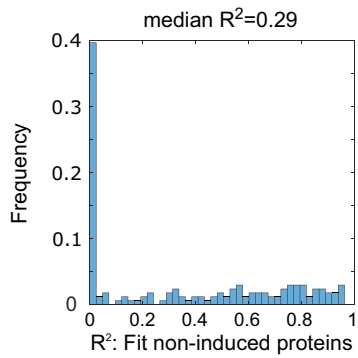

**Figure EV4. Distribution of  $R^2$  values for the fitting of expression of p53 target proteins not induced under oscillatory conditions.**

All proteins that were detectable but not induced under oscillatory p53 were fit for  $k_p^{\text{prot}}$  and  $k_d^{\text{prot}}$  based on mass spectrometry data collected under oscillatory conditions. The distribution of  $R^2$  values for these fits is shown.

**Figure EV5. Expanded view of mechanisms decoding p53 dynamics.**

- A Schematics showing relationship between dynamical mRNA and protein responses for oscillatory mRNA.
- B Four targets with similar mRNA expression profiles—high mRNA degradation rate—but distinct protein profiles due to differences in protein degradation rates, activation thresholds (AT), or existence of cFFLs are shown.
- C, D Venn diagrams showing exclusive or pervasive induction of mRNA and protein. Fifteen percent of mRNA ( $28/191 = 15\%$ ) and 20% ( $16/82 = 20\%$ ) of proteins show exclusive induction. A total of 109 of the 191 mRNAs in (C) failed to induce proteins under either p53 dynamic.

A

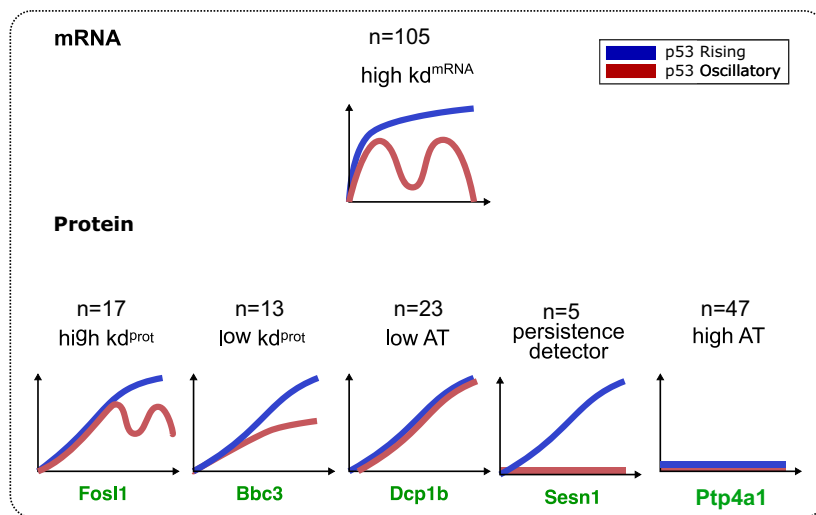

B

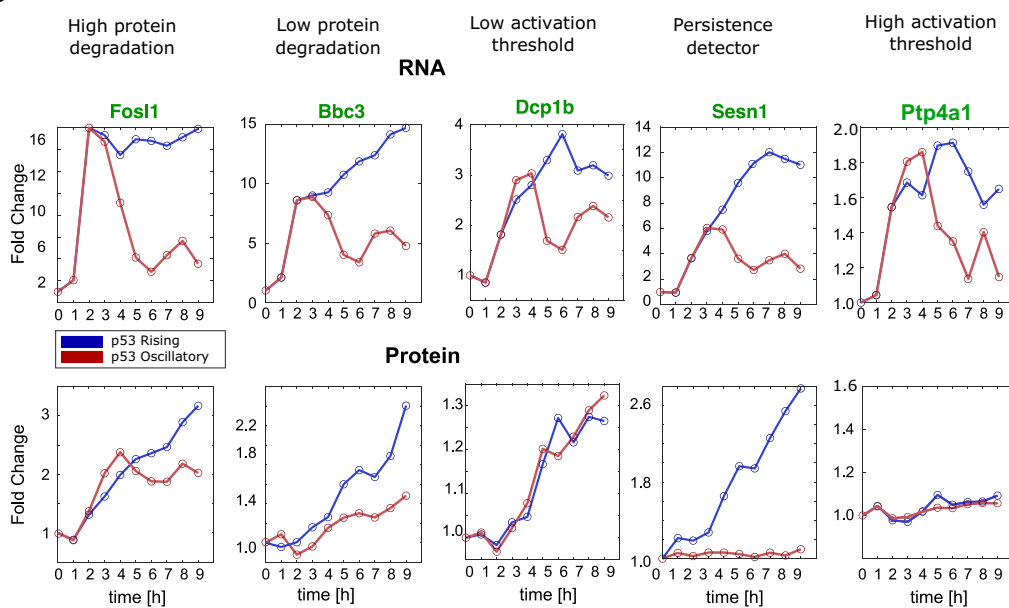

C

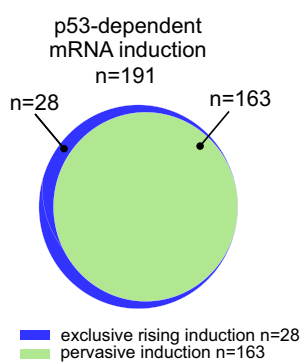

D

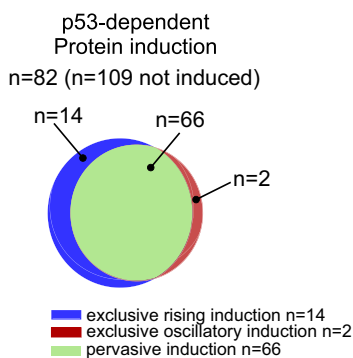

Figure EV5.
