# Supplementary material for: Time‐series transcriptomics and proteomics reveal alternative modes to decode p53 oscillations
Source: PubMed Central journal article supplement (PMC8919251; doi:10.15252/msb.202110588), 2022-03-14
Supplement: MSB-18-e10588-s007.pdf [file MSB-18-e10588-s007.pdf]

# Source Data Figure1

All cropped Western Blots pertaining to Figure 1B-C

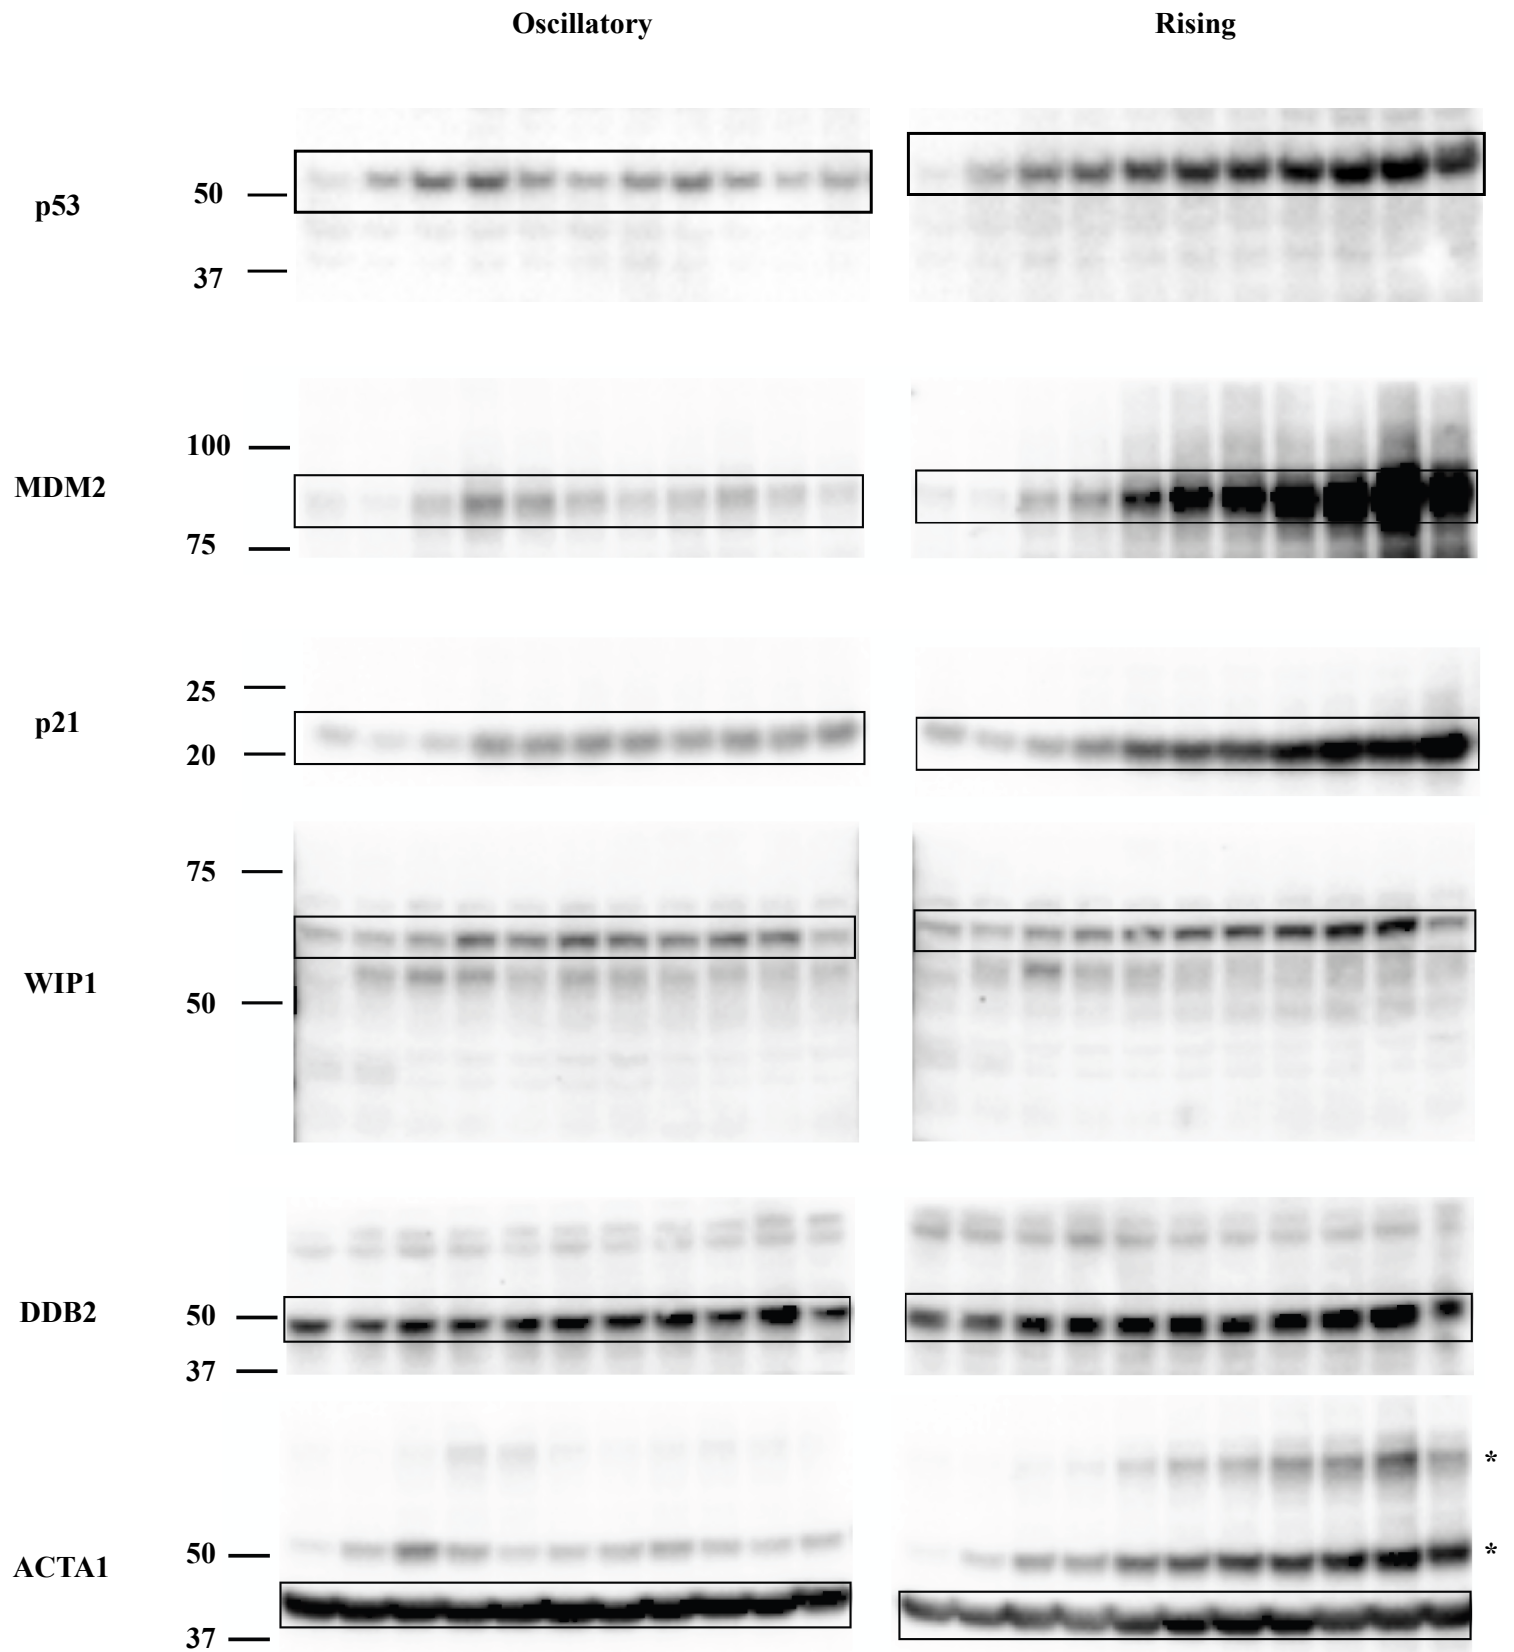

\* = other proteins probed prior to Actin Western Blot

**Source Data Figure 1:** Uncropped scans of Western blot for p53 and select p53 targets under oscillatory and rising conditions. All ladder sizes/units are displayed in kDa. Stars denote proteins which have been probed prior to Actin.
